# Supplementary material for: Estimating extreme river discharges in Europe through a Bayesian network
Source: Copernicus journal article supplement (doi:10.5194/hess-21-2615-2017), 2017-06-02
Supplement: Supplementary file 1 [file hess-21-2615-2017-supplement.zip]

Archive with 8 entries (8 files):
- SI3-5.png
- SI3-1.png
- SI2.pdf
- hess-21-2615-2017-supplement-title-page.pdf
- SI3-2.png
- SI3-4.png
- SI1.pdf
- SI3-3.png
