# Supplementary material for: Estimating extreme river discharges in Europe through a Bayesian network
Source: Copernicus journal article supplement (doi:10.5194/hess-21-2615-2017), 2017-06-02
Supplement: Supplementary file 1 [file hess-21-2615-2017-supplement.zip › hess-21-2615-2017-supplement-title-page.pdf]

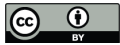

## *Supplement of*

# **Estimating extreme river discharges in Europe through a Bayesian network**

**Dominik Paprotny and Oswaldo Morales-Nápoles**

*Correspondence to:* Dominik Paprotny (d.paprotny@tudelft.nl)

- [hess-21-2615-2017-supplement-title-page.pdf](#)
- [SI1.pdf](#)
- [SI2.pdf](#)
- [SI3-1.png](#)
- [SI3-2.png](#)
- [SI3-3.png](#)
- [SI3-4.png](#)
- [SI3-5.png](#)

The copyright of individual parts of the supplement might differ from the CC BY 3.0 License.
