# Supplementary figures and images for: Estimating extreme river discharges in Europe through a Bayesian network
Source: Copernicus journal article supplement (doi:10.5194/hess-21-2615-2017), 2017-06-02

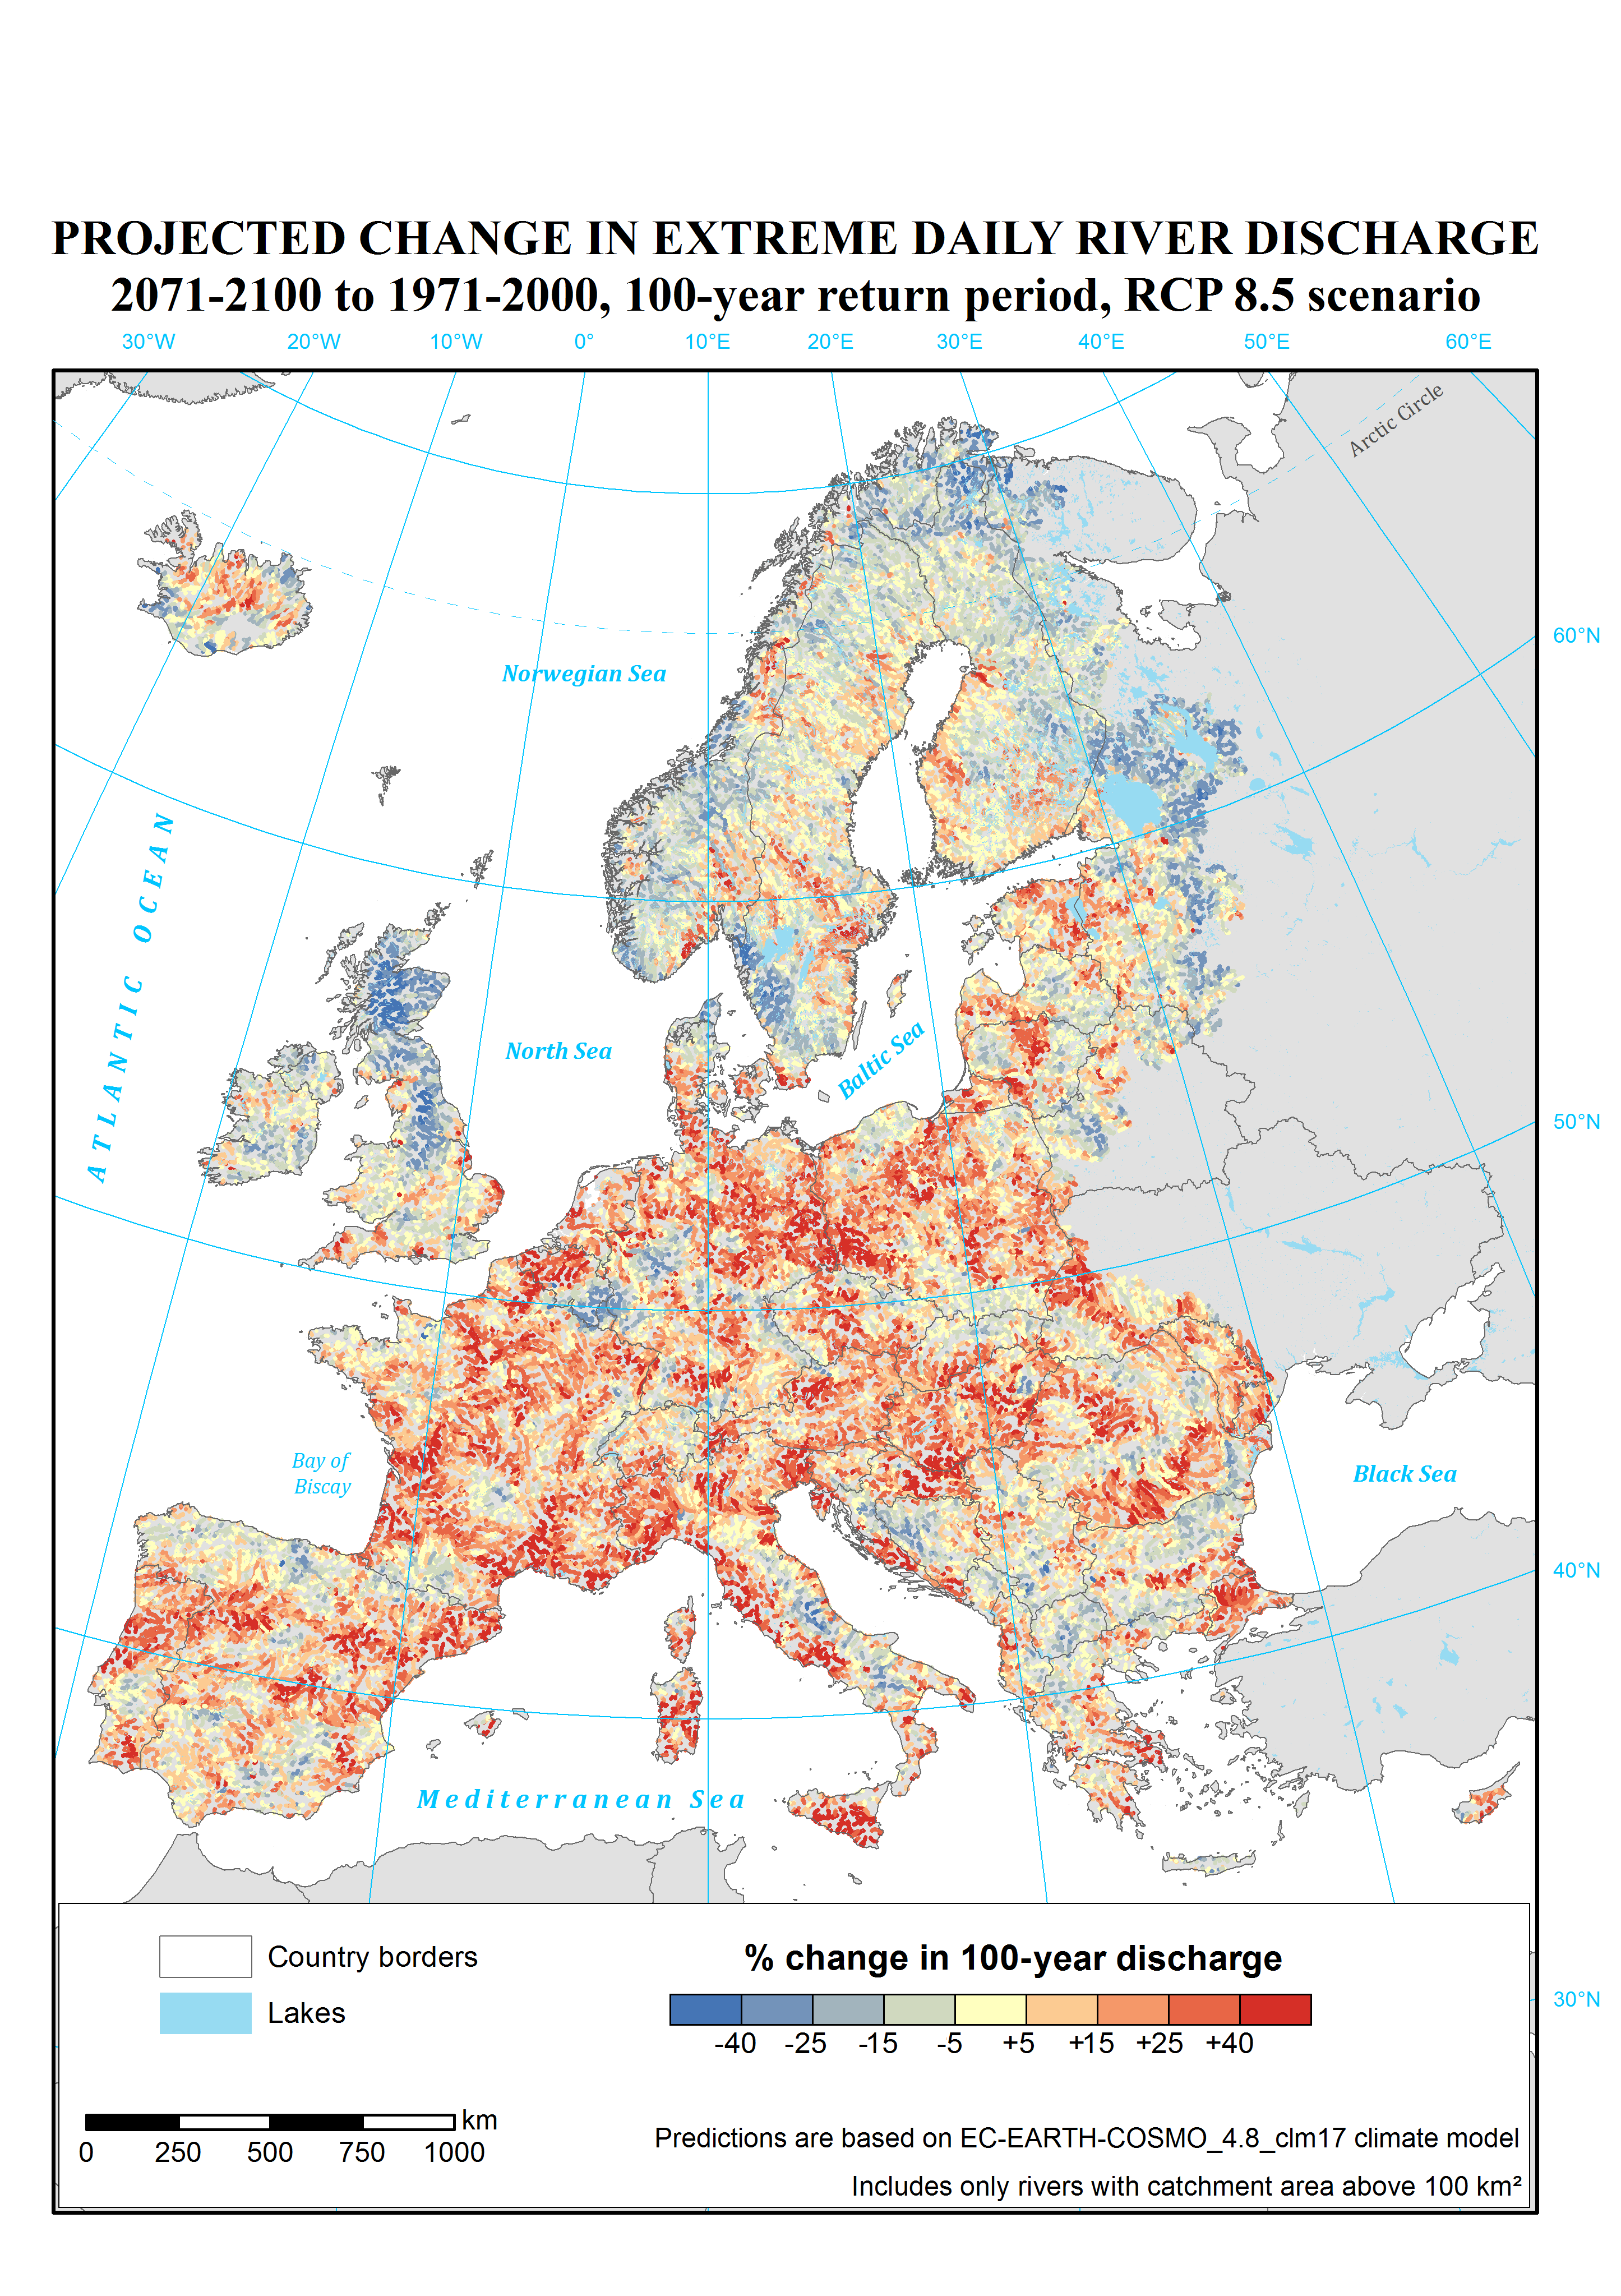

Supplement: Supplementary file 1 [file hess-21-2615-2017-supplement.zip › SI3-5.png]

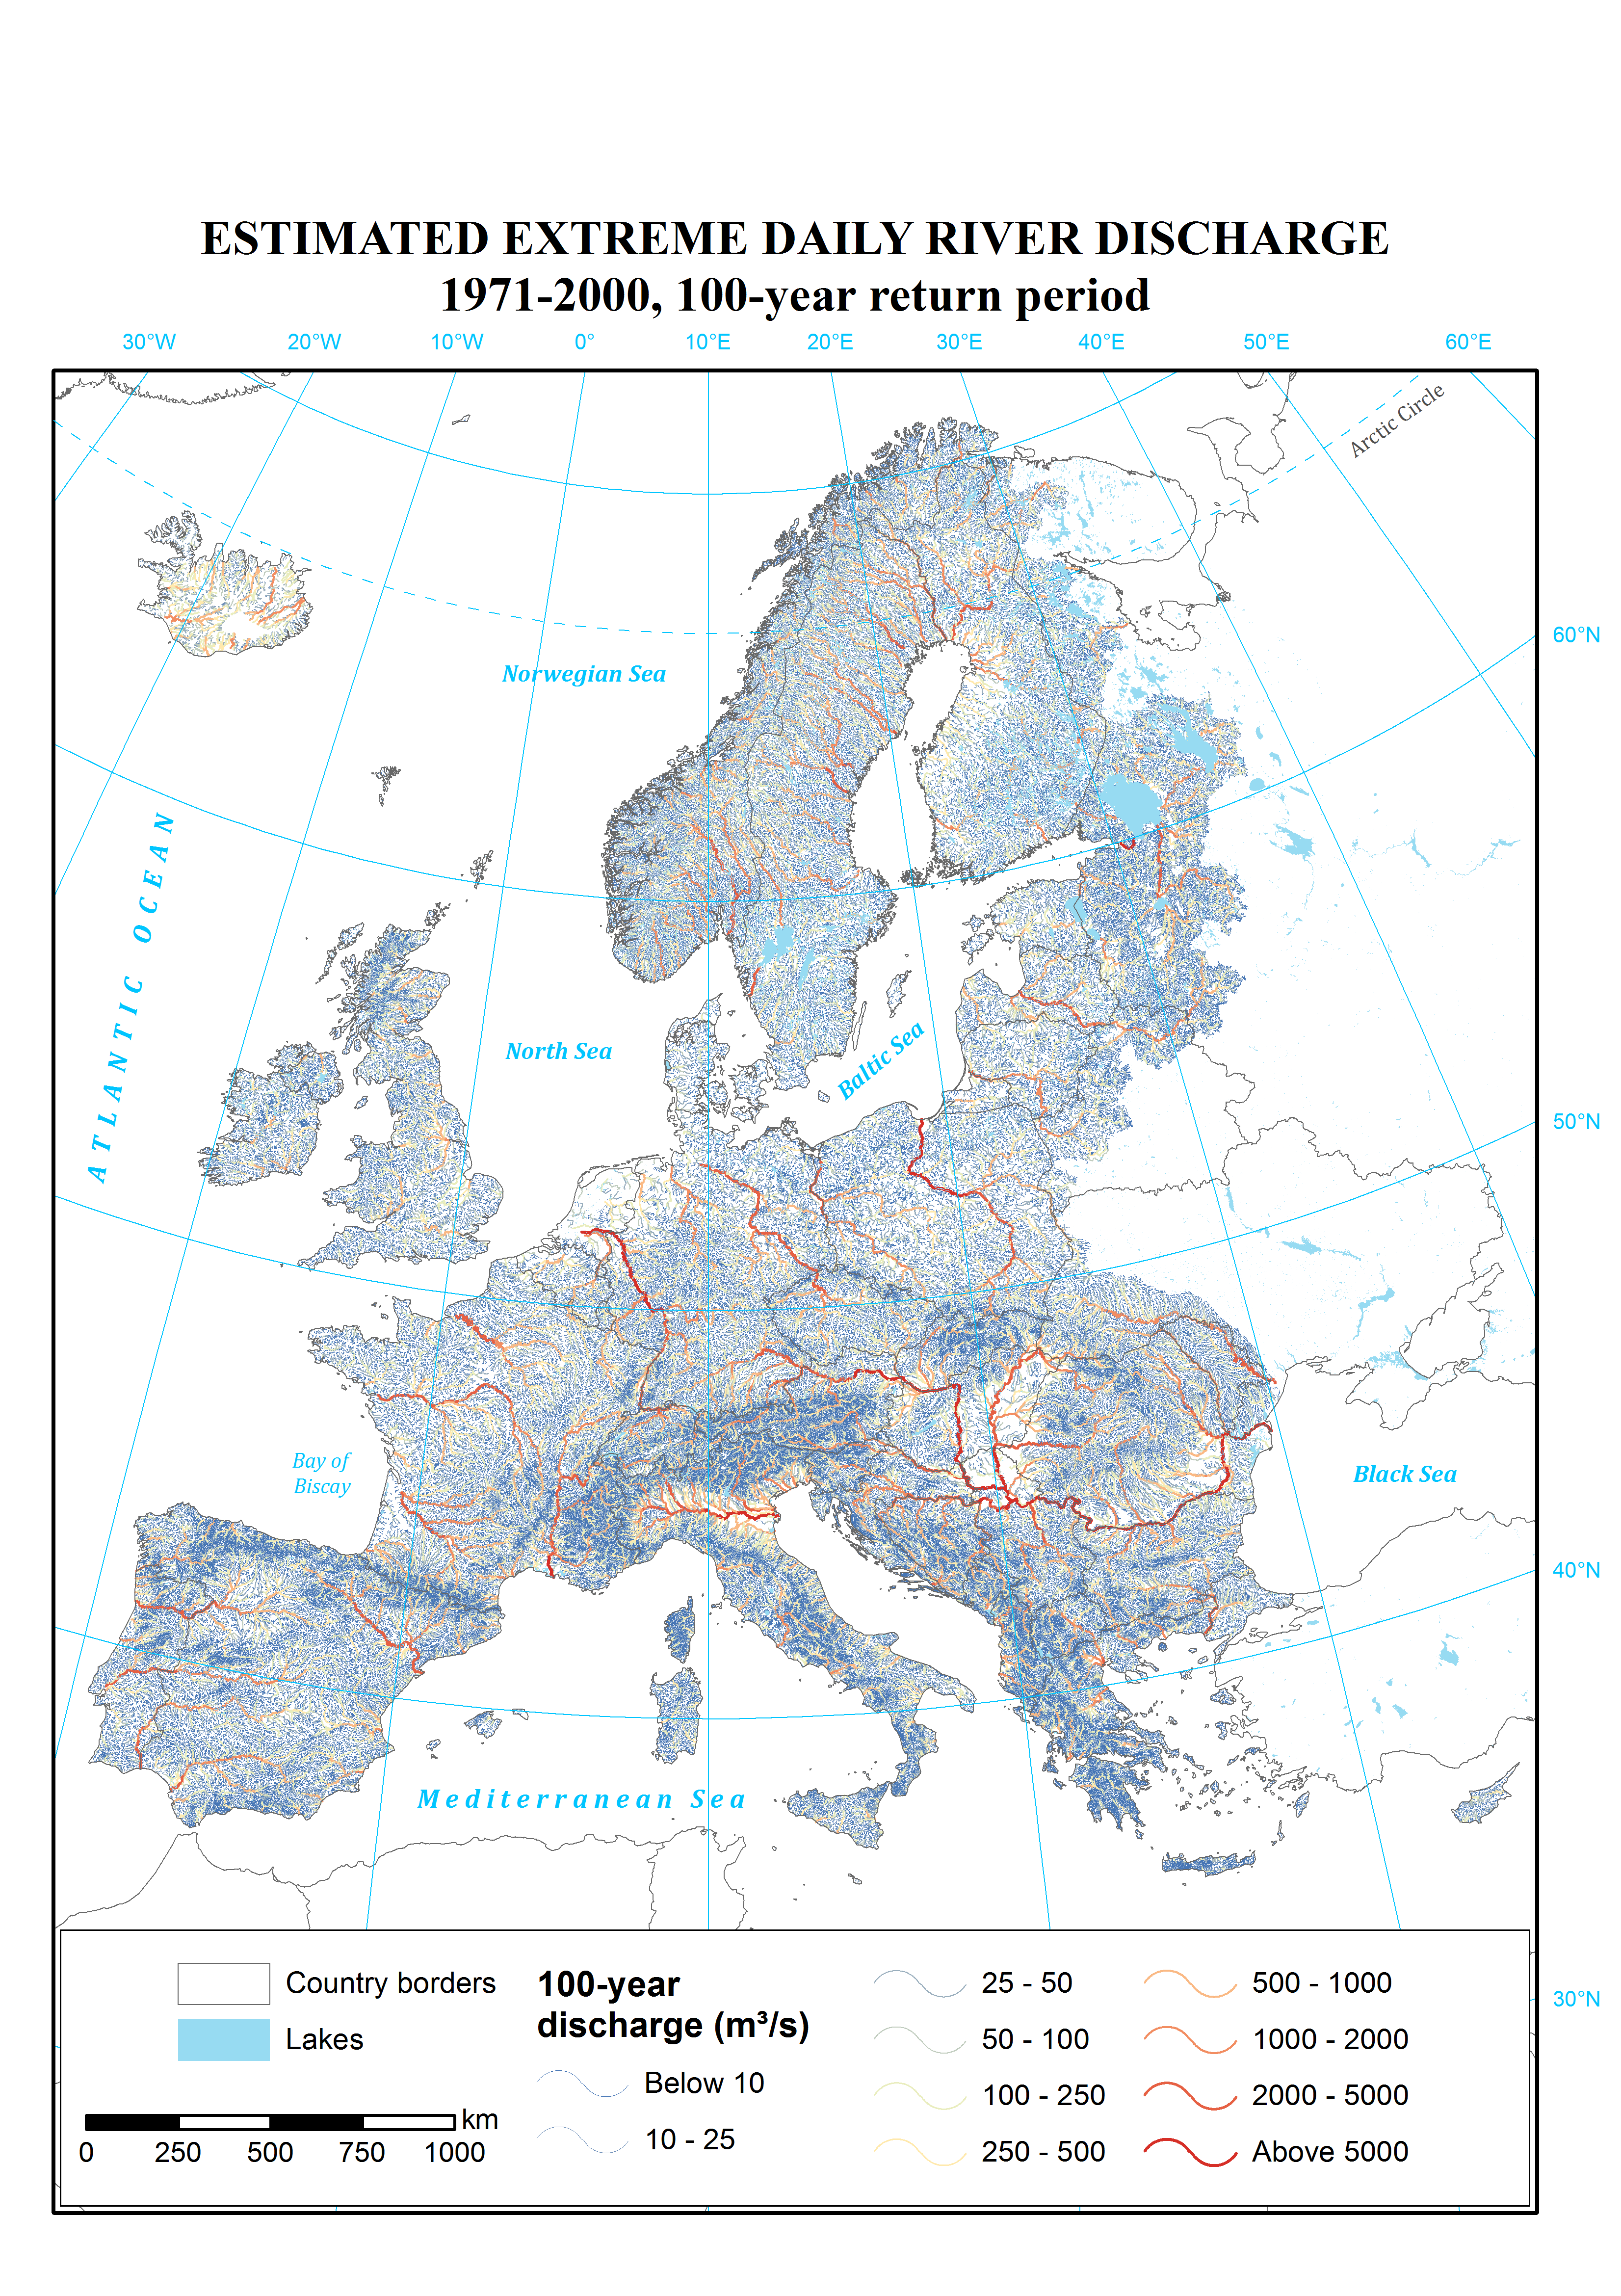

Supplement: Supplementary file 1 [file hess-21-2615-2017-supplement.zip › SI3-1.png]

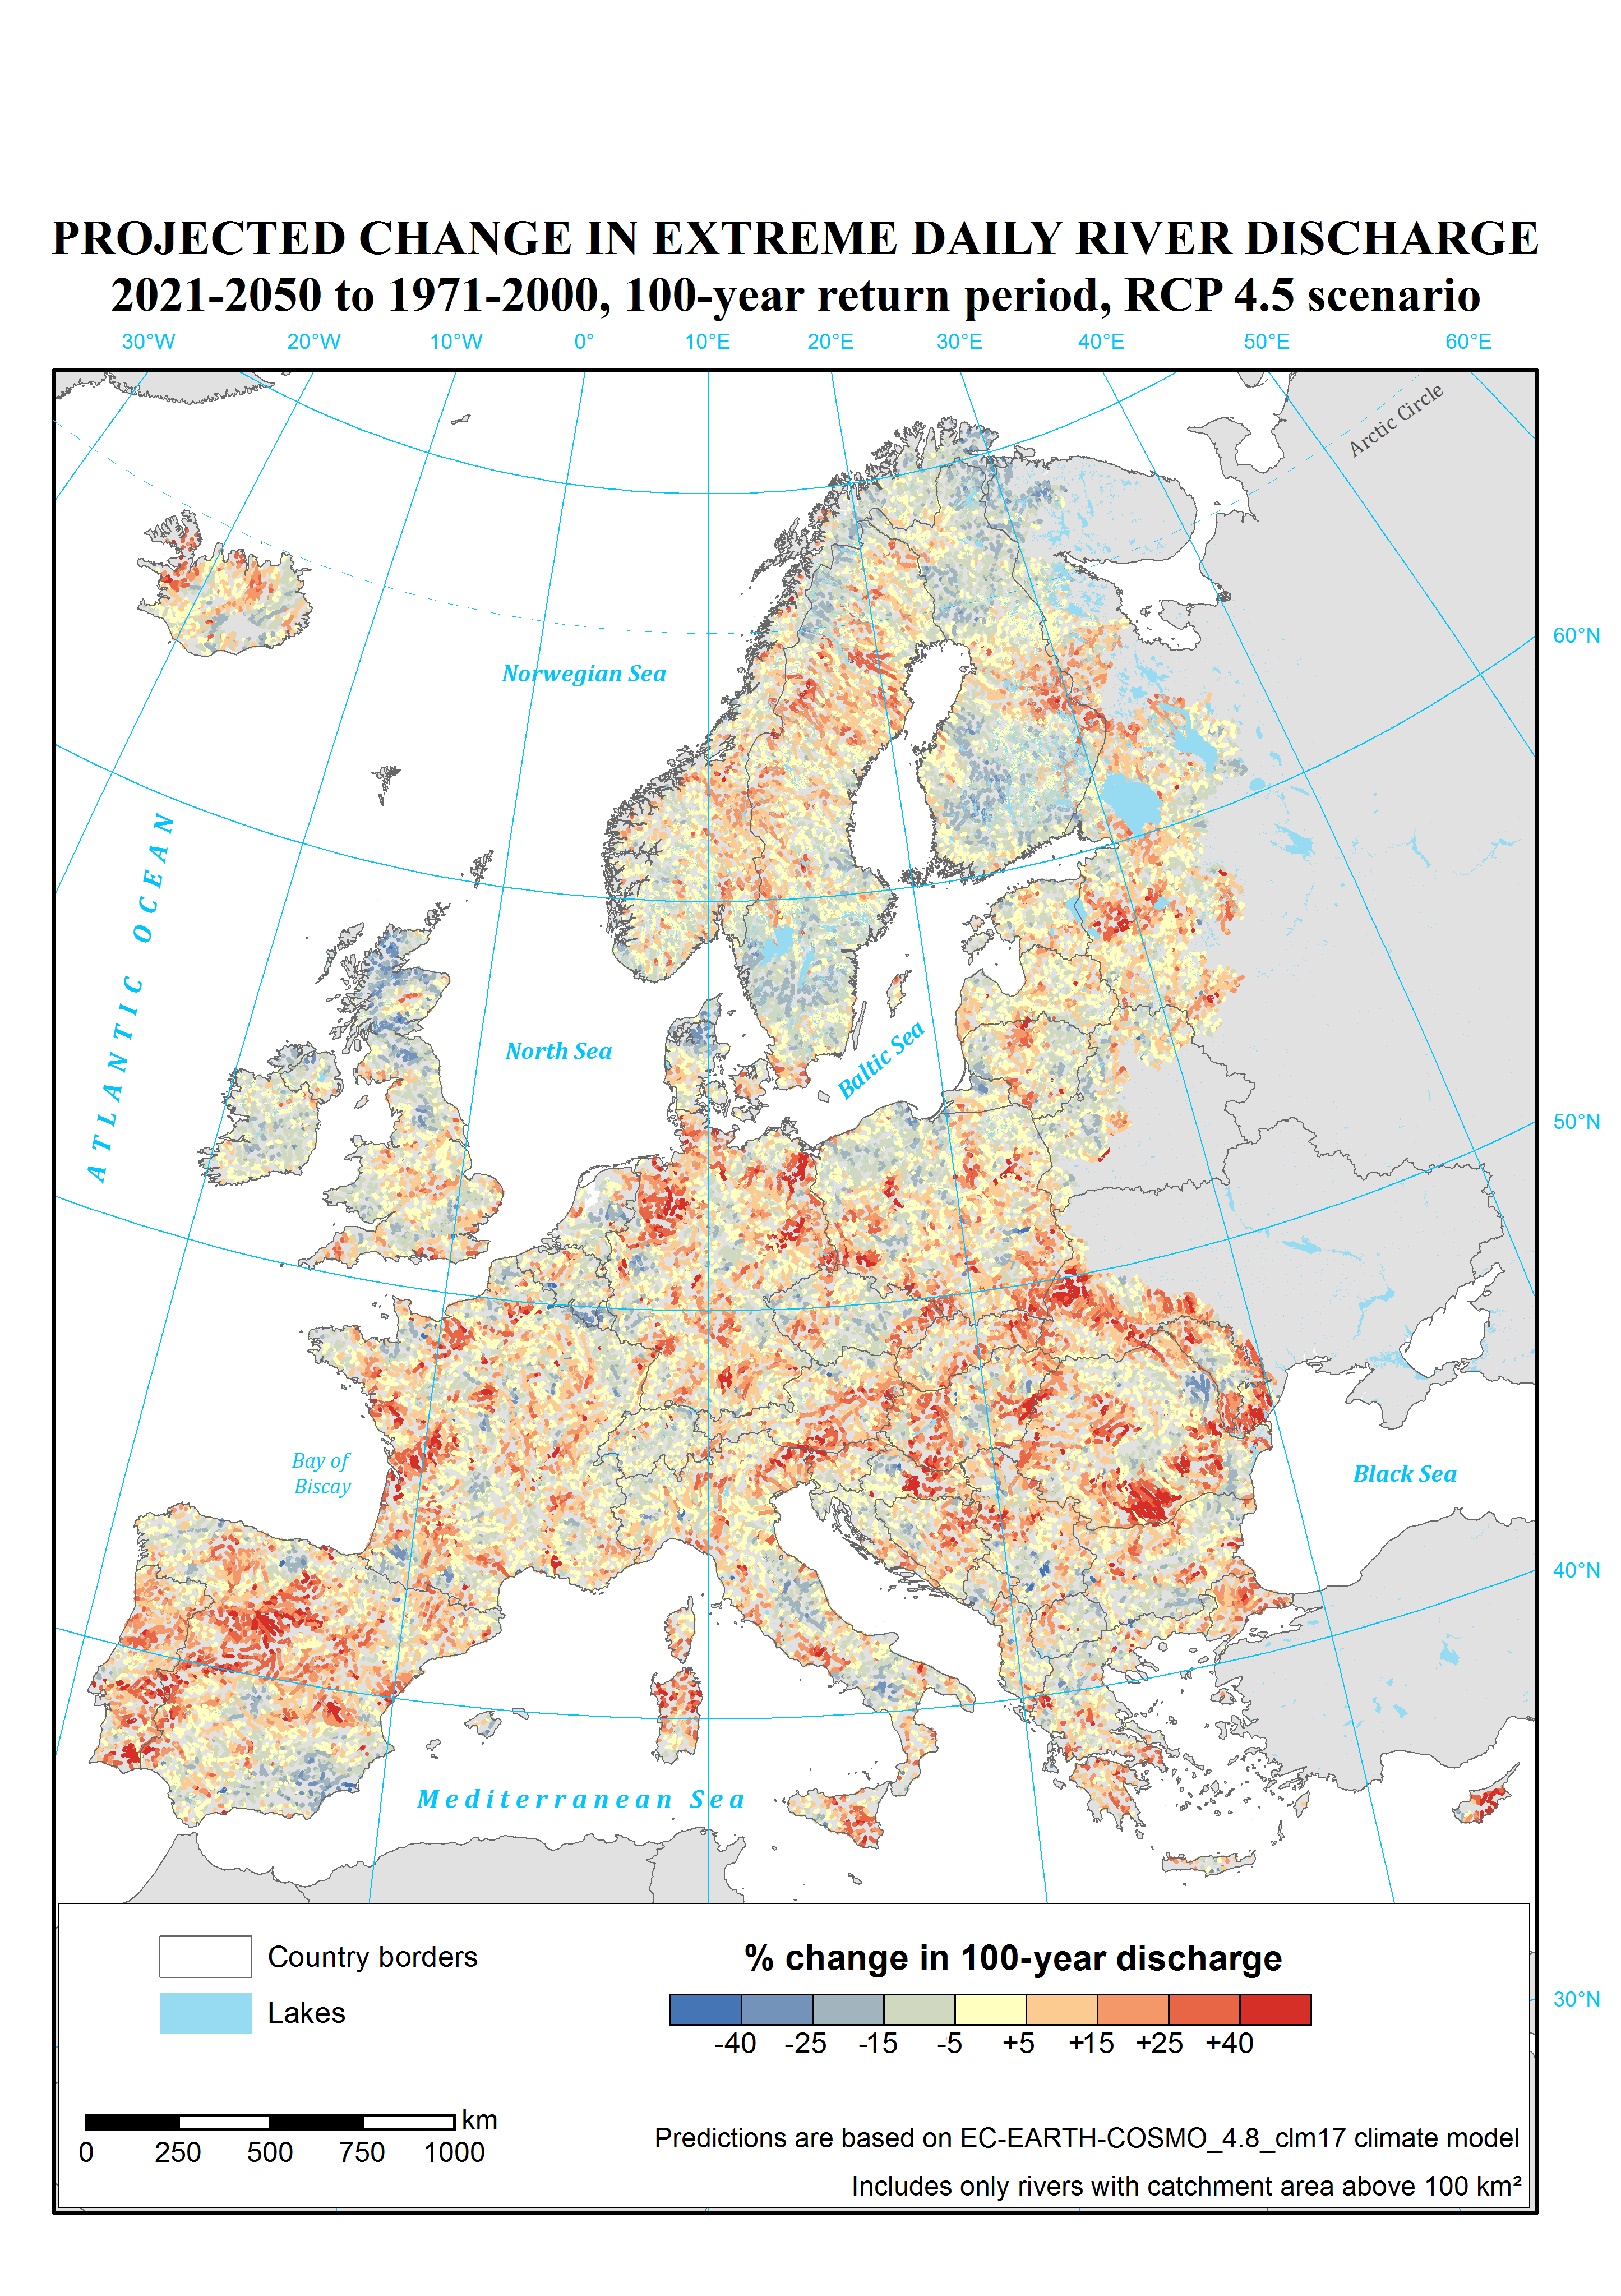

Supplement: Supplementary file 1 [file hess-21-2615-2017-supplement.zip › SI3-2.png]

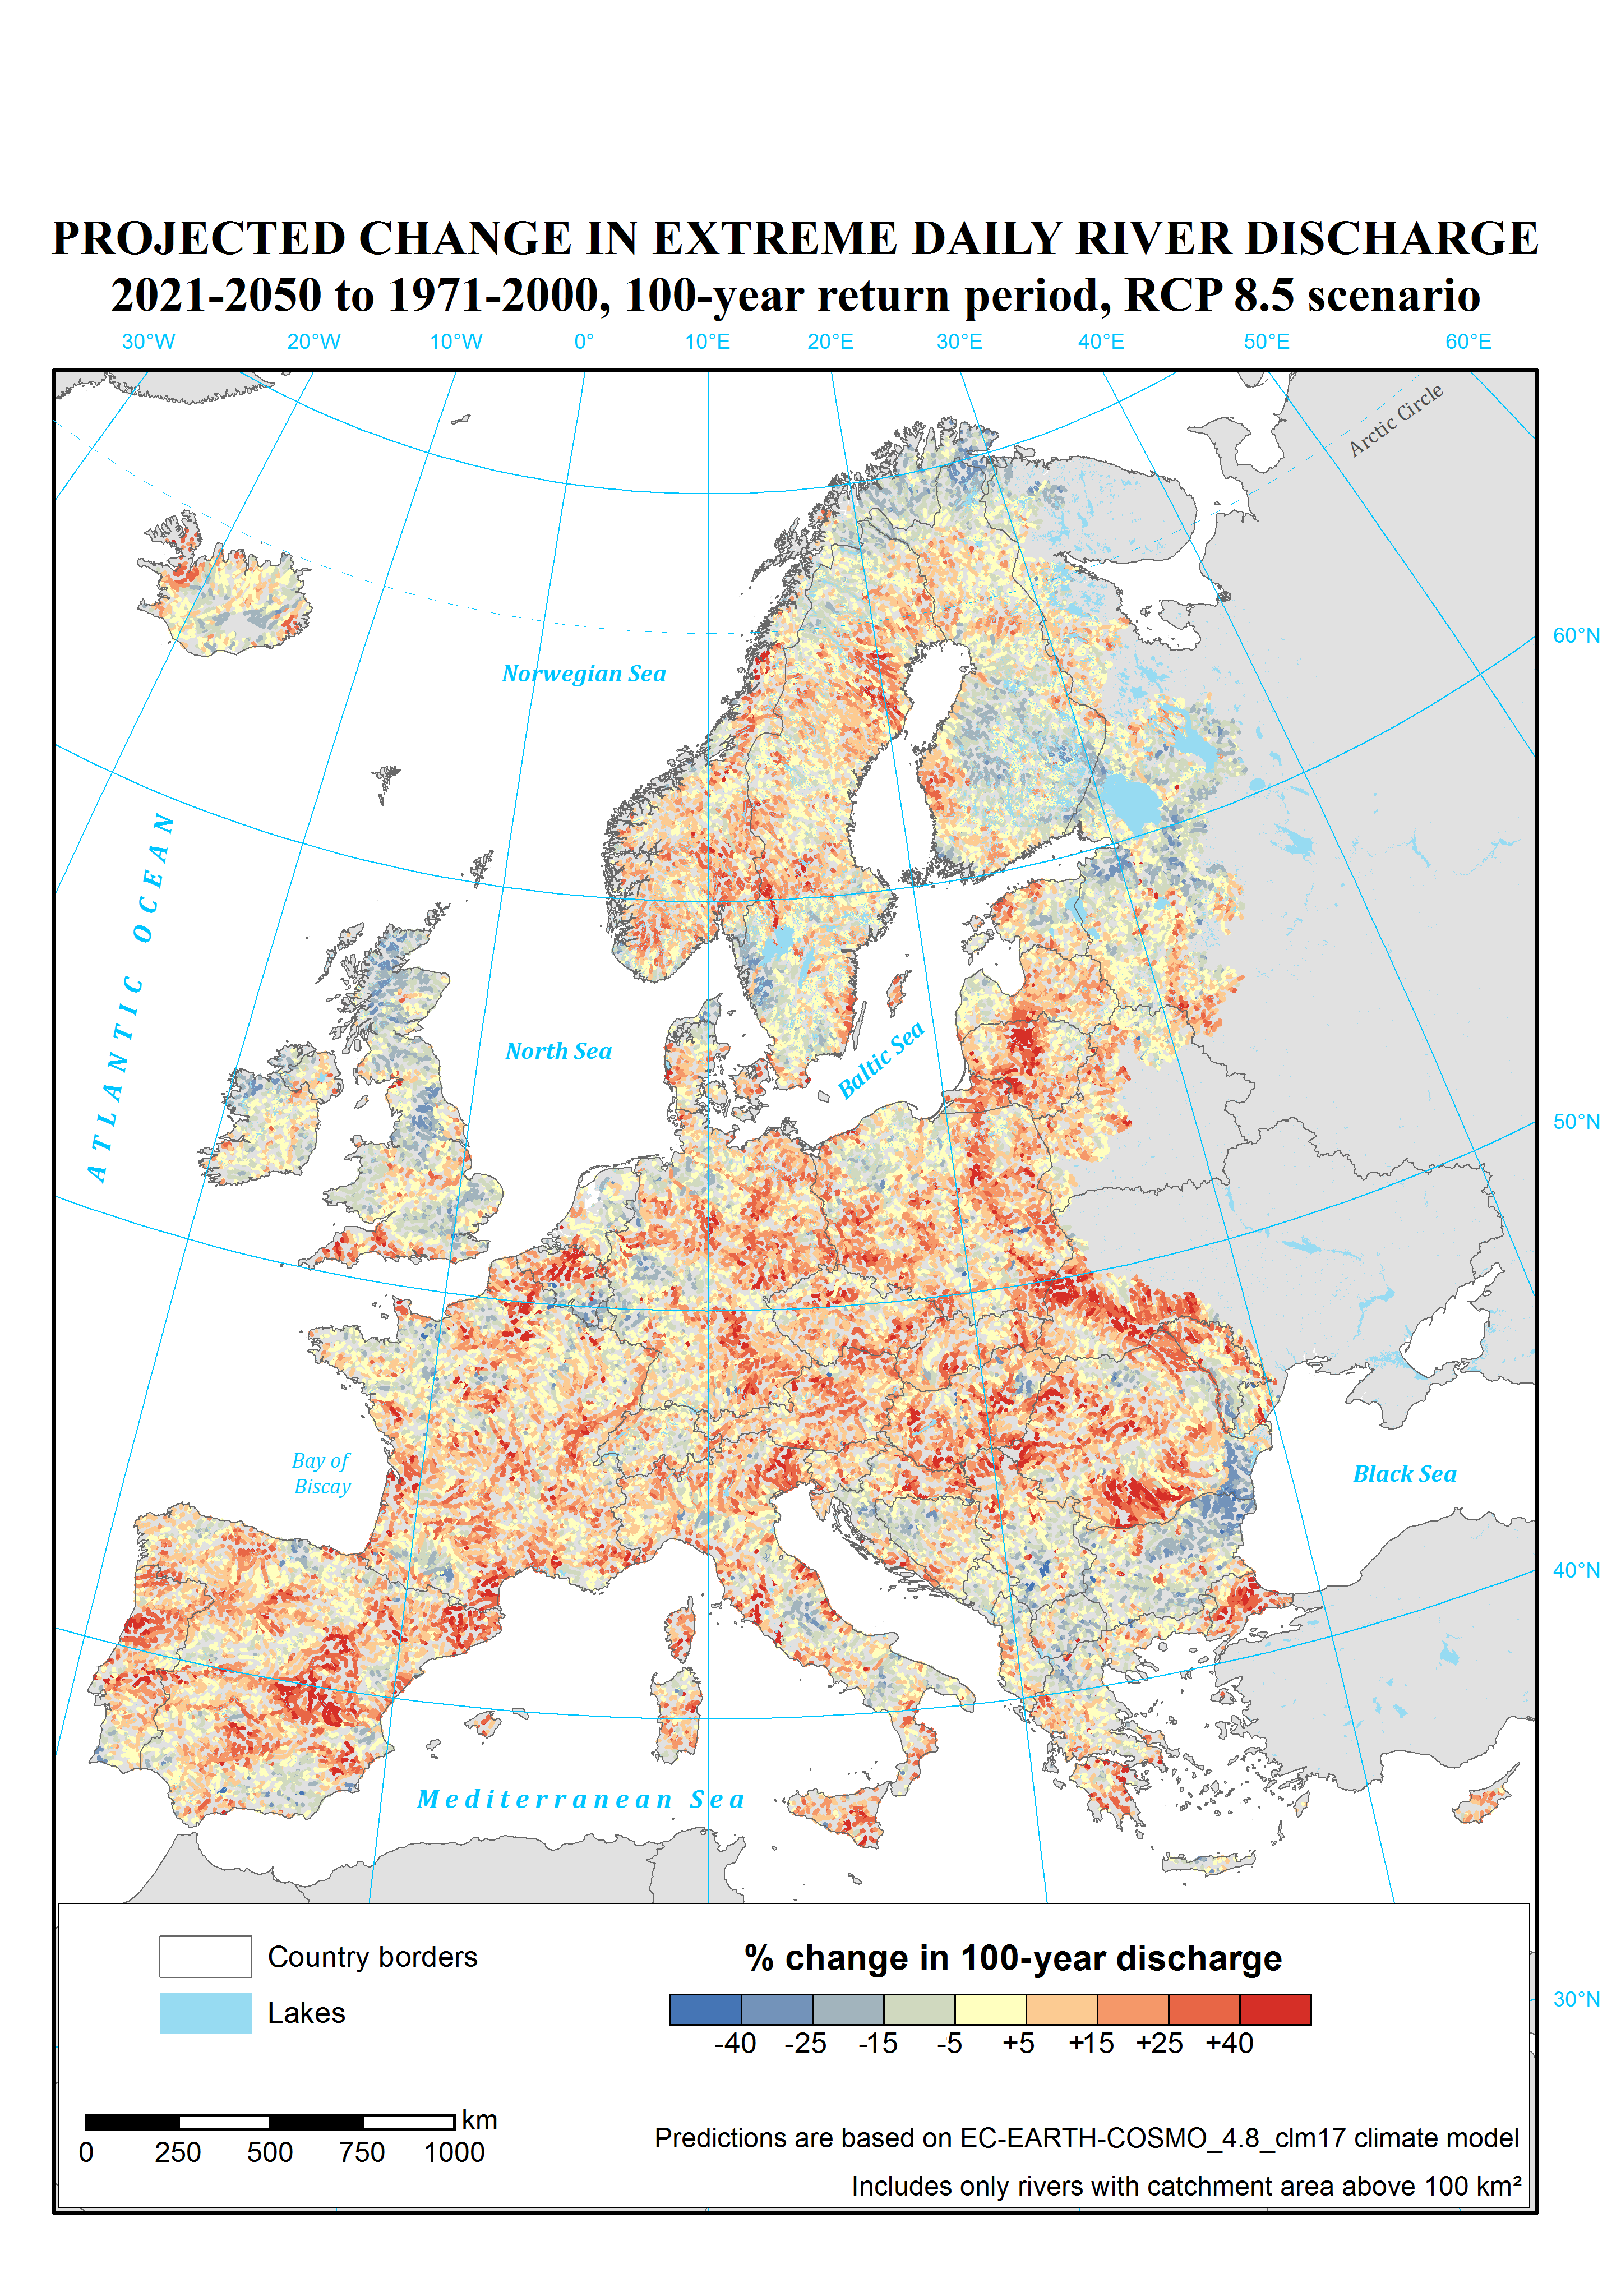

Supplement: Supplementary file 1 [file hess-21-2615-2017-supplement.zip › SI3-4.png]

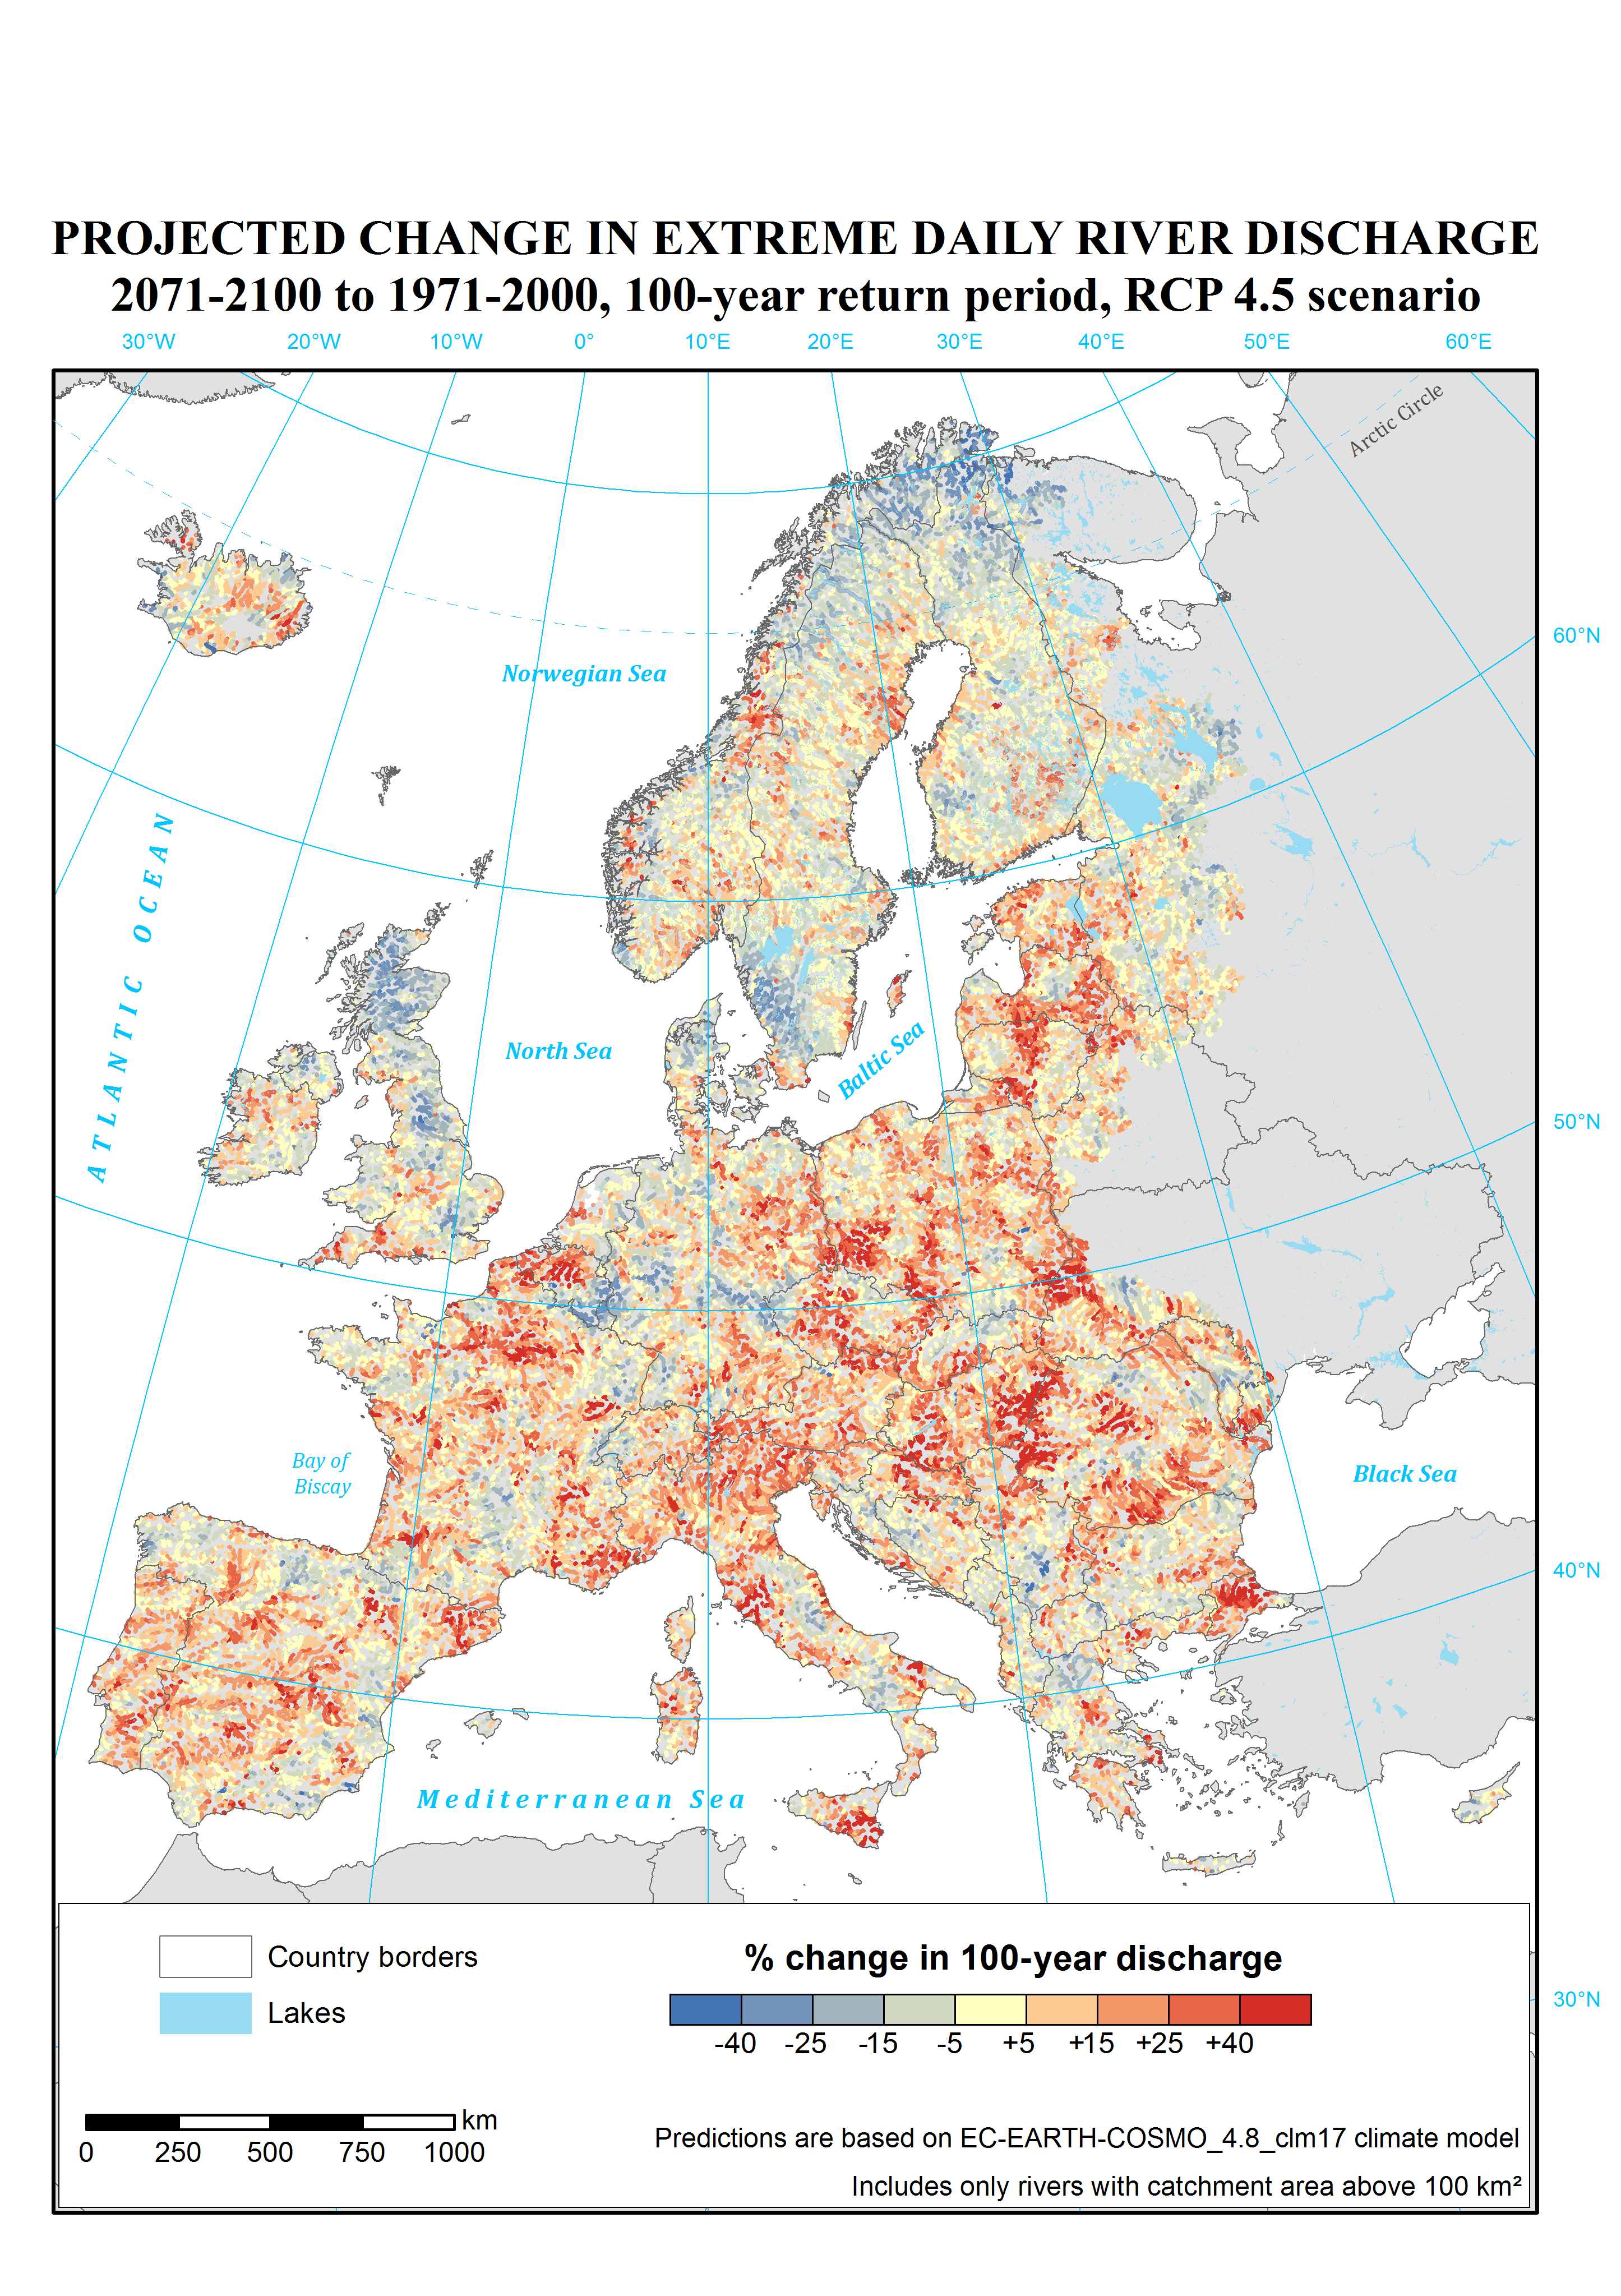

Supplement: Supplementary file 1 [file hess-21-2615-2017-supplement.zip › SI3-3.png]
